# Supplementary material for: Compound signature detection on LINCS L1000 big data
Source: Royal Society of Chemistry journal article supplement (doi:10.1039/c4mb00677a), 2015-01-12
Supplement: c4mb00677a3.xlsx [file c4mb00677a3.xlsx]

## Sheet: Summary
Chemotherapy
	Univariable						Multivariable
Variables	Hazard Ratio (95% CI)			Relative risk	p-value		Hazard Ratio (95% CI)			Relative risk	p-value
		Cl	Cu	(z)				Cl	Cu	(z)
age	1	1	1.1	1.9	0.0678		1	0.98	1.1	1.1	0.25
size	1	1	1	1.8	0.101		1	0.99	1	0.68	0.49
pam50	1.2	0.44	3.5	0.26	0.343		0.052	0.0024	1.1	-1.9	0.06
subtype	0.92	0.29	3.4	-0.25	0.328		23	0.91	> 100	1.9	0.057
lymphnode	2.2	0.99	4.7	1.9	0.0386		2.8	0.74	10	1.5	0.13
ER	0.72	0.38	1.4	-1	0.307		0.33	0.1	1.1	-1.8	0.067
grade	1	0.23	4.6	0.025	0.979		0.41	0.041	4.1	-0.76	0.45
Sig1	0.99	0.53	1.9	-0.04	0.968		0.55	0.2	1.6	-1.1	0.27
Sig2	0.78	0.42	1.5	-0.77	0.443		0.98	0.32	3	-0.035	0.97
Sig3	0.95	0.5	1.8	-0.16	0.871		0.55	0.19	1.6	-1.1	0.28
Sig4	2.3	1.2	4.5	2.5	0.00956		3.8	1.4	10	2.6	0.0092
Sig5	2	1.1	3.7	2.1	0.0331		1.5	0.56	3.8	0.78	0.43
Sig6	1.2	0.64	2.3	0.59	0.558		1.8	0.63	5.4	1.1	0.27
Sig7	0.97	0.52	1.8	-0.088	0.93		0.96	0.27	3.4	-0.071	0.94
Sig8	1.2	0.62	2.2	0.5	0.616		0.46	0.13	1.6	-1.2	0.22
Tamoxifen
Univariable							Multivariable
Variables	Hazard Ratio (95% CI)			Relative risk	p-value		Hazard Ratio (95% CI)			Relative risk	p-value
		Cl	Cu	(z)				Cl	Cu	(z)
age	1	0.99	1	0.92	0.359		1	0.98	1	0.35	0.73
size	1	1	1	6.9	< 0.0001		1	1	1	4	< 0.0001
pam50	1	0.51	2.2	-0.34	< 0.0001		2.1	0.92	4.8	1.8	0.076
subtype	0.81	0.42	1.6	-1.2	< 0.0001		0.22	0.067	0.7	-2.6	0.011
lymphnode	2.4	1.7	3.3	5	< 0.0001		1.7	1.1	2.6	2.4	0.018
ER	0.39	0.22	0.71	-3.1	0.00651		0.52	0.24	1.1	-1.7	0.097
grade	5.4	2.3	13	3.9	< 0.0001		2.4	0.99	6	1.9	0.054
Sig1	0.88	0.63	1.2	-0.73	0.466		0.9	0.57	1.4	-0.47	0.64
Sig2	1.1	0.78	1.5	0.5	0.616		1.6	0.96	2.6	1.8	0.069
Sig3	1.1	0.8	1.6	0.67	0.501		1.3	0.85	2	1.2	0.21
Sig4	1.2	0.83	1.6	0.89	0.372		1.4	0.89	2.1	1.4	0.15
Sig5	0.93	0.66	1.3	-0.44	0.657		0.84	0.55	1.3	-0.82	0.41
Sig6	0.98	0.7	1.4	-0.14	0.888		0.81	0.53	1.2	-0.95	0.34
Sig7	0.97	0.69	1.4	-0.17	0.866		1.4	0.84	2.3	1.3	0.2
Sig8	0.84	0.6	1.2	-1	0.303		0.63	0.39	1	-2	0.05

## Sheet: Uni-Chem
	exp(coef)	Hazard ratio (95% Cl)	Hazard ratio (95% Cu)	Relative risk (z)	Pr(>|z|)
age	1	1	1.1	1.9	0.0678
size	1	1	1	1.8	0.101
pam50	1.2	0.44	3.5	0.26	0.343
subtype	0.92	0.29	3.4	-0.25	0.328
lymphnode	2.2	0.99	4.7	1.9	0.0386
ER	0.72	0.38	1.4	-1	0.307
grade	1	0.23	4.6	0.025	0.979
Sig1	0.99	0.53	1.9	-0.04	0.968
Sig2	0.78	0.42	1.5	-0.77	0.443
Sig3	0.95	0.5	1.8	-0.16	0.871
Sig4	2.3	1.2	4.5	2.5	0.00956
Sig5	2	1.1	3.7	2.1	0.0331
Sig6	1.2	0.64	2.3	0.59	0.558
Sig7	0.97	0.52	1.8	-0.088	0.93
Sig8	1.2	0.62	2.2	0.5	0.616

## Sheet: Uni-Tam
	exp(coef)	Hazard ratio (95% Cl)	Hazard ratio (95% Cu)	Relative risk (z)	Pr(>|z|)
age	1	0.99	1	0.92	0.359
size	1	1	1	6.9	6.28e-09
pam50	1	0.51	2.2	-0.34	2.5e-09
subtype	0.81	0.42	1.6	-1.2	8.46e-11
lymphnode	2.4	1.7	3.3	5	6.55e-07
ER	0.39	0.22	0.71	-3.1	0.00651
grade	5.4	2.3	13	3.9	1.05e-06
Sig1	0.88	0.63	1.2	-0.73	0.466
Sig2	1.1	0.78	1.5	0.5	0.616
Sig3	1.1	0.8	1.6	0.67	0.501
Sig4	1.2	0.83	1.6	0.89	0.372
Sig5	0.93	0.66	1.3	-0.44	0.657
Sig6	0.98	0.7	1.4	-0.14	0.888
Sig7	0.97	0.69	1.4	-0.17	0.866
Sig8	0.84	0.6	1.2	-1	0.303

## Sheet: Multi-Chem
	exp(coef)	Hazard ratio (95% Cl)	Hazard ratio (95% Cu)	Relative risk (z)	Pr(>|z|)
age	1	0.98	1.1	1.1	0.25
size	1	0.99	1	0.68	0.49
pam50:ClaudinLow	0.27	0.018	4.2	-0.93	0.35
pam50:Her2	1.8	0.34	9.3	0.68	0.5
pam50:LumA	0.16	0.011	2.2	-1.4	0.17
pam50:LumB	0.052	0.0024	1.1	-1.9	0.06
pam50:Normal	0.15	0.011	1.9	-1.5	0.14
subtype:Her2	3.3	0.61	18	1.4	0.17
subtype:LumA	2.1	0.068	64	0.42	0.67
subtype:LumB	23	0.91	570	1.9	0.057
subtype:Normal	5.6	0.31	100	1.2	0.24
subtype:NoSubtype	12	0.68	230	1.7	0.09
lymphnode:LN+	2.8	0.74	10	1.5	0.13
ER:ER+	0.33	0.1	1.1	-1.8	0.067
grade:G2	0.69	0.081	5.9	-0.34	0.73
grade:G3	0.41	0.041	4.1	-0.76	0.45
Sig1	0.55	0.2	1.6	-1.1	0.27
Sig2	0.98	0.32	3	-0.035	0.97
Sig3	0.55	0.19	1.6	-1.1	0.28
Sig4	3.8	1.4	10	2.6	0.0092
Sig5	1.5	0.56	3.8	0.78	0.43
Sig6	1.8	0.63	5.4	1.1	0.27
Sig7	0.96	0.27	3.4	-0.071	0.94
Sig8	0.46	0.13	1.6	-1.2	0.22

## Sheet: Multi-Tam
	exp(coef)	Hazard ratio (95% Cl)	Hazard ratio (95% Cu)	Relative risk (z)	Pr(>|z|)
age	1	0.98	1	0.35	0.73
size	1	1	1	4	6.2e-05
pam50:ClaudinLow	1.1	0.28	4.4	0.15	0.88
pam50:Her2	1.5	0.7	3.3	1	0.29
pam50:LumA	1.4	0.51	4.1	0.69	0.49
pam50:LumB	2.1	0.92	4.8	1.8	0.076
pam50:Normal	1.1	0.37	3.5	0.23	0.82
subtype:Her2	1.4	0.62	3.1	0.79	0.43
subtype:LumA	0.29	0.11	0.77	-2.5	0.012
subtype:LumB	0.6	0.27	1.4	-1.2	0.23
subtype:Normal	0.22	0.067	0.7	-2.6	0.011
subtype:NoSubtype	0.42	0.14	1.3	-1.5	0.13
lymphnode:LN+	1.7	1.1	2.6	2.4	0.018
ER:ER+	0.52	0.24	1.1	-1.7	0.097
grade:G2	2.4	0.99	6	1.9	0.054
grade:G3	1.9	0.71	5	1.3	0.21
Sig1	0.9	0.57	1.4	-0.47	0.64
Sig2	1.6	0.96	2.6	1.8	0.069
Sig3	1.3	0.85	2	1.2	0.21
Sig4	1.4	0.89	2.1	1.4	0.15
Sig5	0.84	0.55	1.3	-0.82	0.41
Sig6	0.81	0.53	1.2	-0.95	0.34
Sig7	1.4	0.84	2.3	1.3	0.2
Sig8	0.63	0.39	1	-2	0.05
